# Supplementary material
Source: publisher figshare collection journal article supplement (https://acs.figshare.com/ndownloader/files/7794961)
Supplement: Supplementary file 1 [file 7794961]

# Supporting Information for “Reading the orbital angular momentum of light using plasmonic nanoantennas”

Richard M. Kerber,<sup>\*,†</sup> Jamie M. Fitzgerald,<sup>‡</sup> Doris E. Reiter,<sup>†,‡</sup> Sang Soon Oh,<sup>‡</sup>  
and Ortwin Hess<sup>\*,‡</sup>

*Institut für Festkörpertheorie, Universität Münster, 48149 Münster, Germany, and  
Department of Physics, The Blackett Laboratory, Imperial College London, South  
Kensington Campus, London SW7 2AZ, United Kingdom*

E-mail: r.kerber@wwu.de; o.hess@imperial.ac.uk

---

<sup>\*</sup>To whom correspondence should be addressed

<sup>†</sup>Institut für Festkörpertheorie, Universität Münster,  
48149 Münster, Germany

<sup>‡</sup>Department of Physics, The Blackett Laboratory,  
Imperial College London, South Kensington Campus,  
London SW7 2AZ, United Kingdom

## Movies of the induced electric field

The movies show the temporal evolution of the induced electric field calculated with the BEM (Dynamics\_BEM.avi) and with the analytical antenna model (Dynamics\_Antennamodel.avi). We consider an excitation of the nanoantenna array consisting of three rods with twisted light having an OAM of  $\ell = 0$  (left),  $\ell = +1$  (middle) and  $\ell = -1$  (right). The excitation frequency is chosen to match the corresponding resonance frequency  $\omega_r = 2\pi c/\lambda_r$ . The movies display the intensity of the electric field on a logarithmic scale for four periods  $T_r = 2\pi/\omega_r$  at  $z = 0$ . We find a good qualitative agreement for the BEM and the analytical model, displaying a rotating mode for  $\ell = 0$ , a rotating mode with inverted direction for  $\ell = +1$  and a breathing mode for  $\ell = -1$ .
